# Supplementary material for: Platinum–acetylide polymer based solar cells: involvement of the triplet state for energy conversion
Source: Royal Society of Chemistry journal article supplement (doi:10.1039/b516086c), 2006-01-01
Supplement: b516086c.pdf [file b516086c.pdf]

Supplementary Material (ESI) for Chemical Communications

This journal is © The Royal Society of Chemistry 2006

**Supporting Information**

**Platinum-Acetylide Polymer Based Solar Cells: Involvement of the  
Triplet State for Energy Conversion**

Fengqi Guo, Young-Gi Kim, John R. Reynolds\* and Kirk S. Schanze\*  
Department of Chemistry, Center for Macromolecular Science and Engineering  
University of Florida, Gainesville, FL 32611-7200

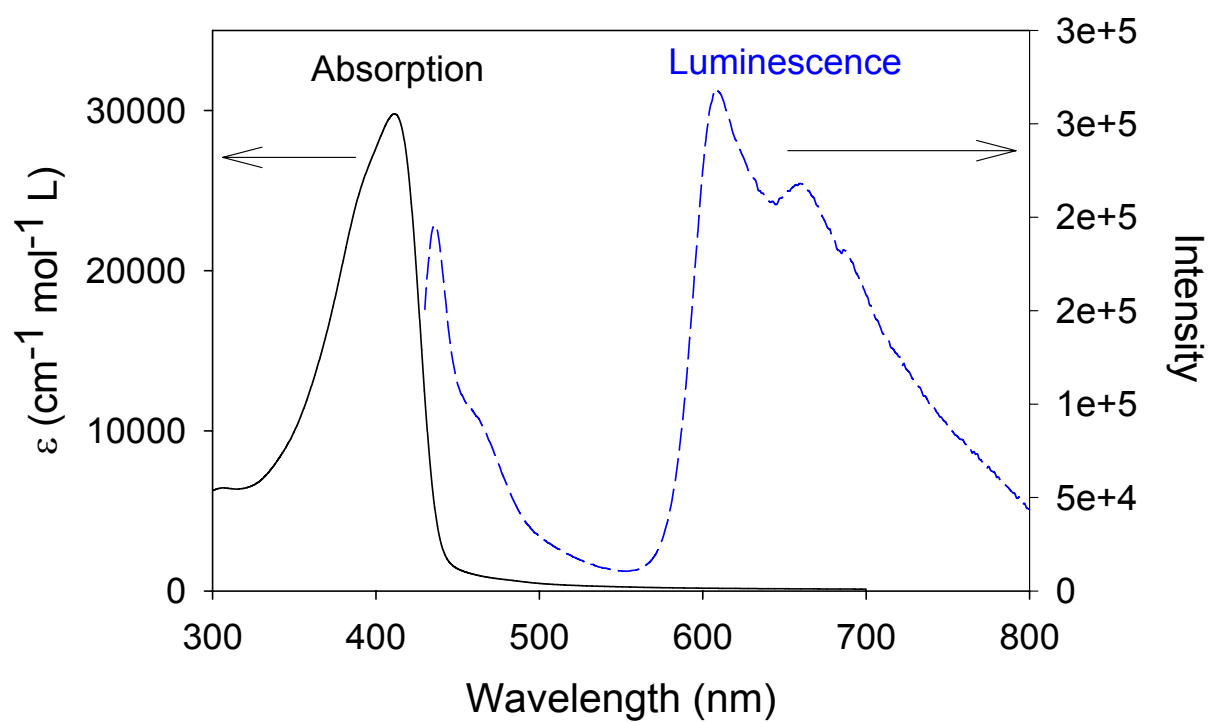

**Figure S-1.** Absorption and photoluminescence spectra of p-PtTh in o-DCB solution. Emission spectrum obtained on solution that was outgassed by bubbling with argon for 30 min. Excitation wavelength 400 nm.

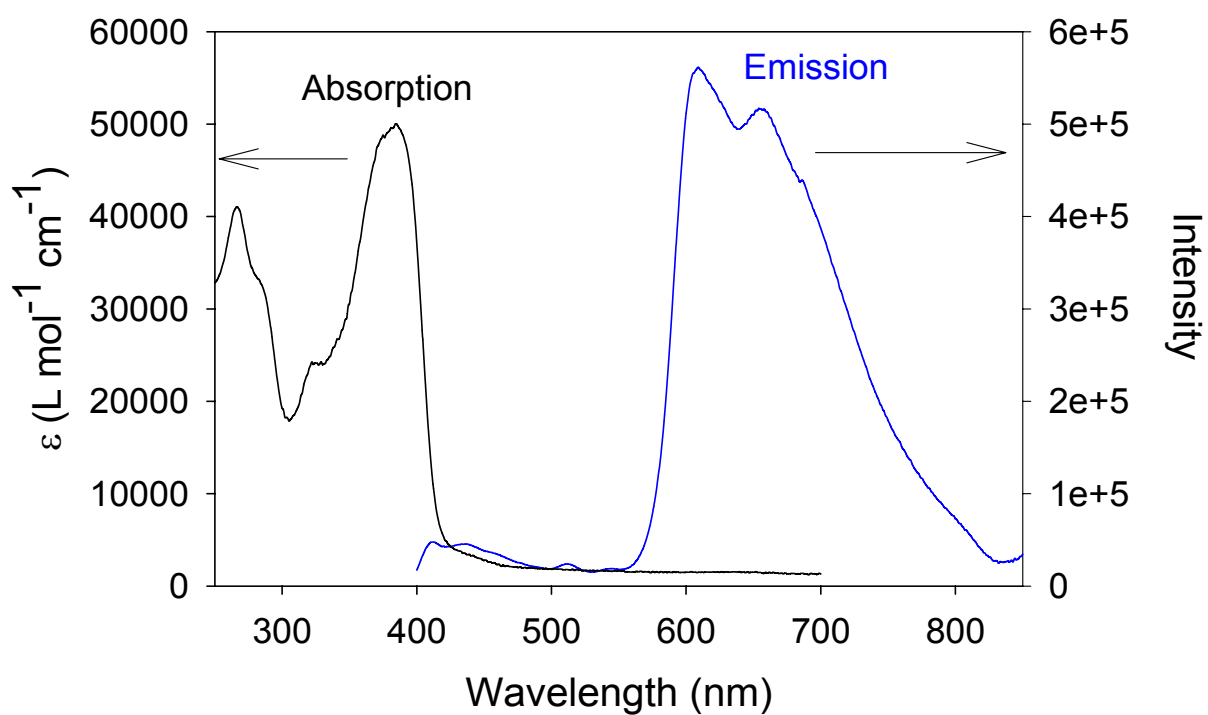

**Figure S-2.** Absorption and photoluminescence spectra of Pt<sub>2</sub>Th in o-DCB solution. Emission spectrum obtained on solution that was outgassed by bubbling with argon for 30 min. Excitation wavelength 380 nm.

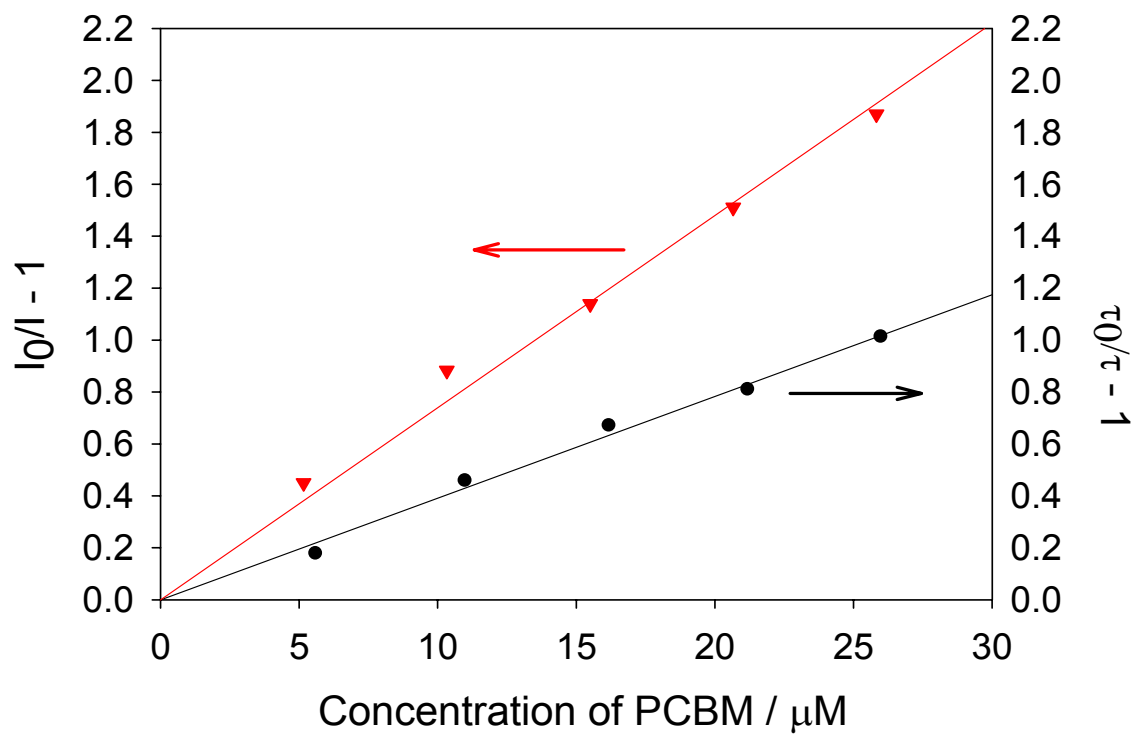

**Figure S-3.** Stern-Volmer quenching plots for quenching of p-PtTh phosphorescence by PCBM in argon outgassed o-DCB solution. ( $\nabla$ ): phosphorescence intensity quenching ( $I^0/I$ ). ( $\bullet$ ): phosphorescence lifetime quenching ( $\tau^0/\tau$ ).
